# Supplementary material for: Selection of Specific Aptamer against Rivaroxaban and Utilization for Label-Free Electrochemical Aptasensing Using Gold Nanoparticles: First Announcement and Application for Clinical Sample Analysis
Source: MDPI journal article supplement (doi:10.3390/bios12100773), 2022-09-20
Supplement: s1 [file s1]

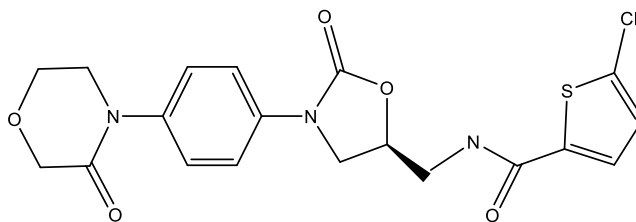

**Figure S1.** Chemical structure of Rivaroxaban

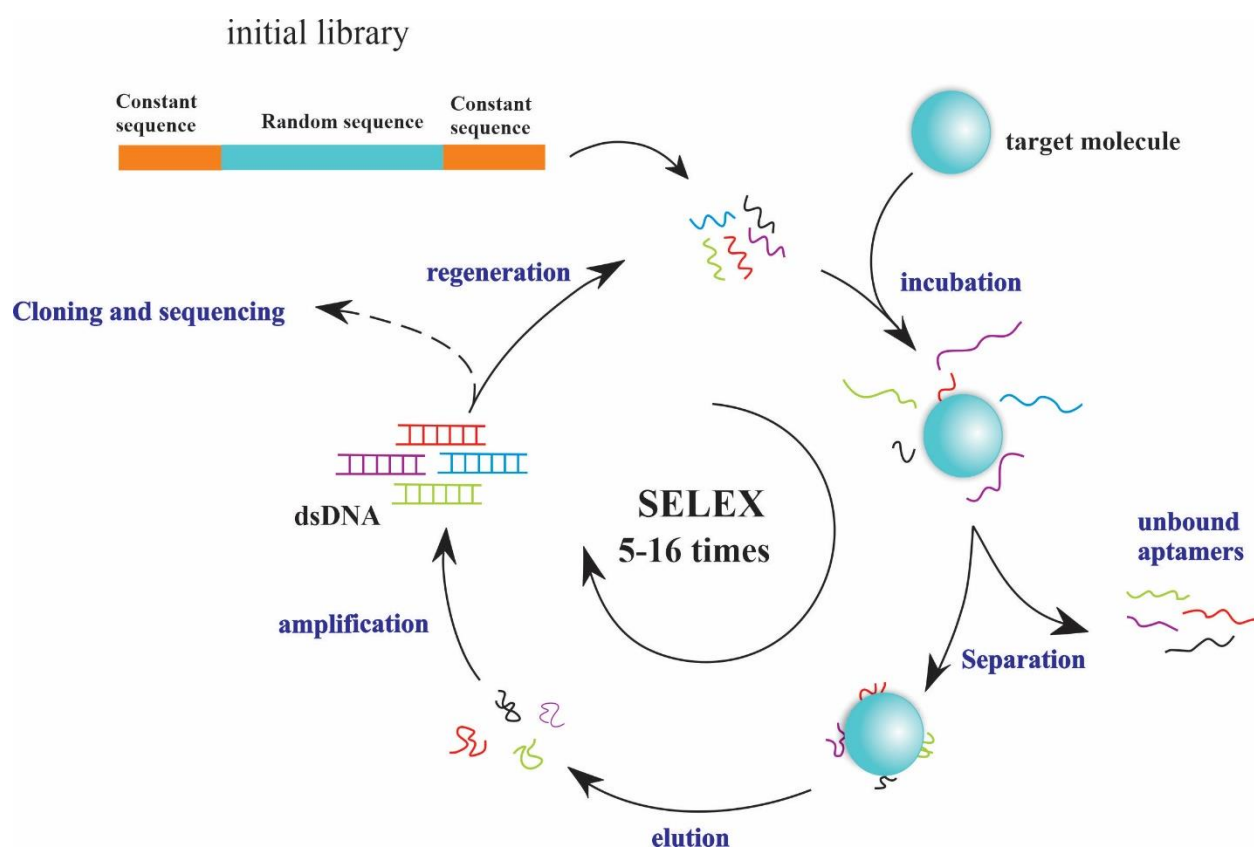

**Scheme S1.** A schematic outline of the SELEX procedure using modified RIV-Sepharose toward aptamer discovery.

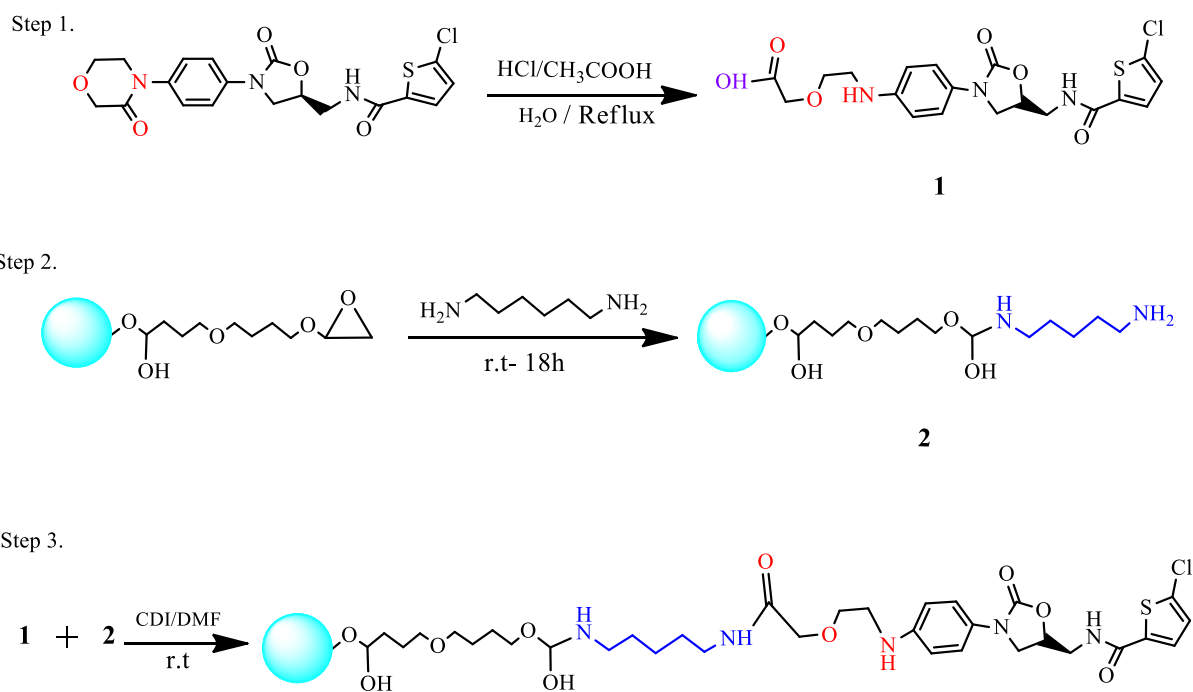

**Figure S2.** Coupling reaction of RIV with epoxy-activated Sepharose bead.

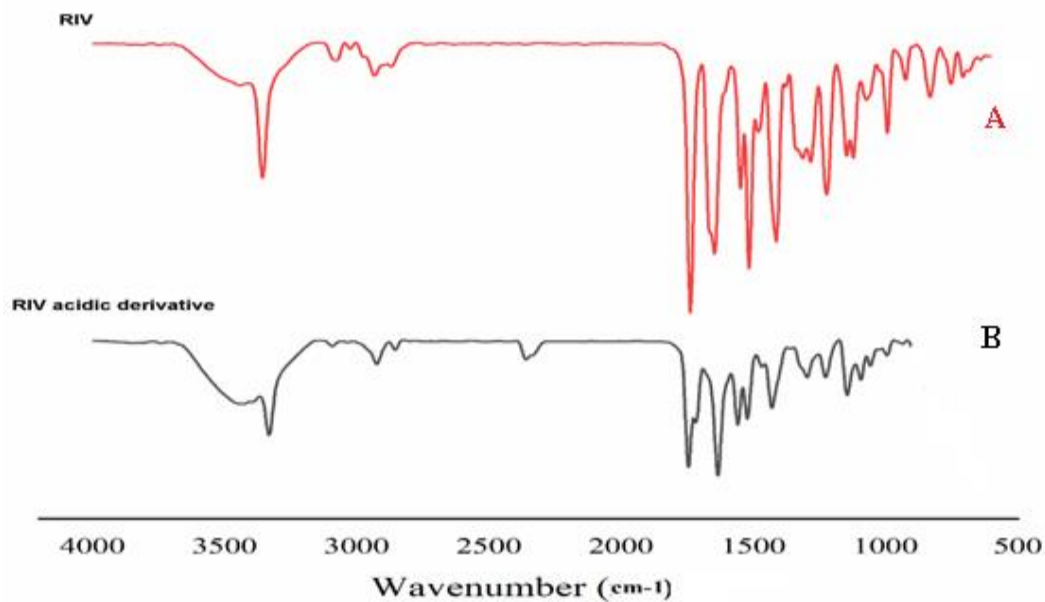

**Figure S3.** The FT-IR spectra of A, RIV, B, RIV-acidic derivative

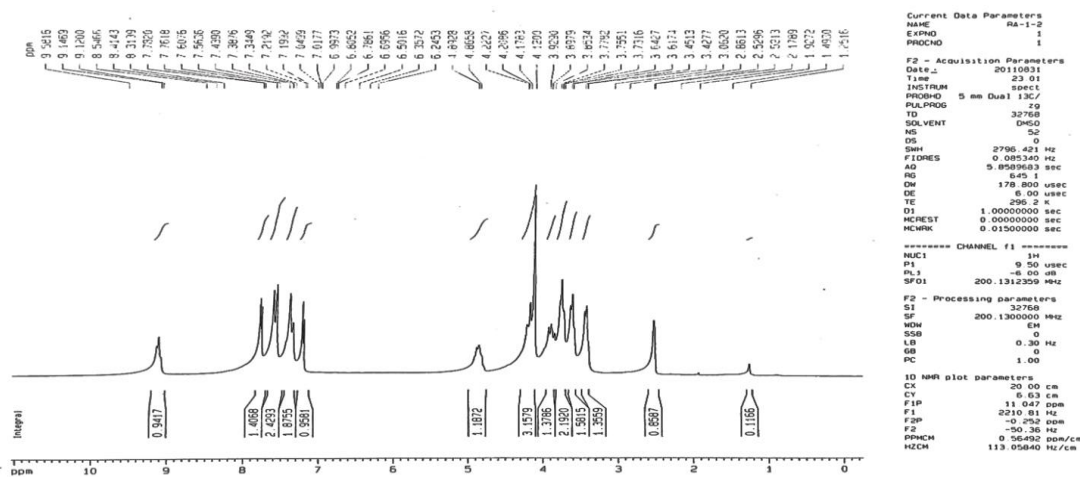

**Figure S4.**  $^1\text{H}$  NMR spectra of compound (1)

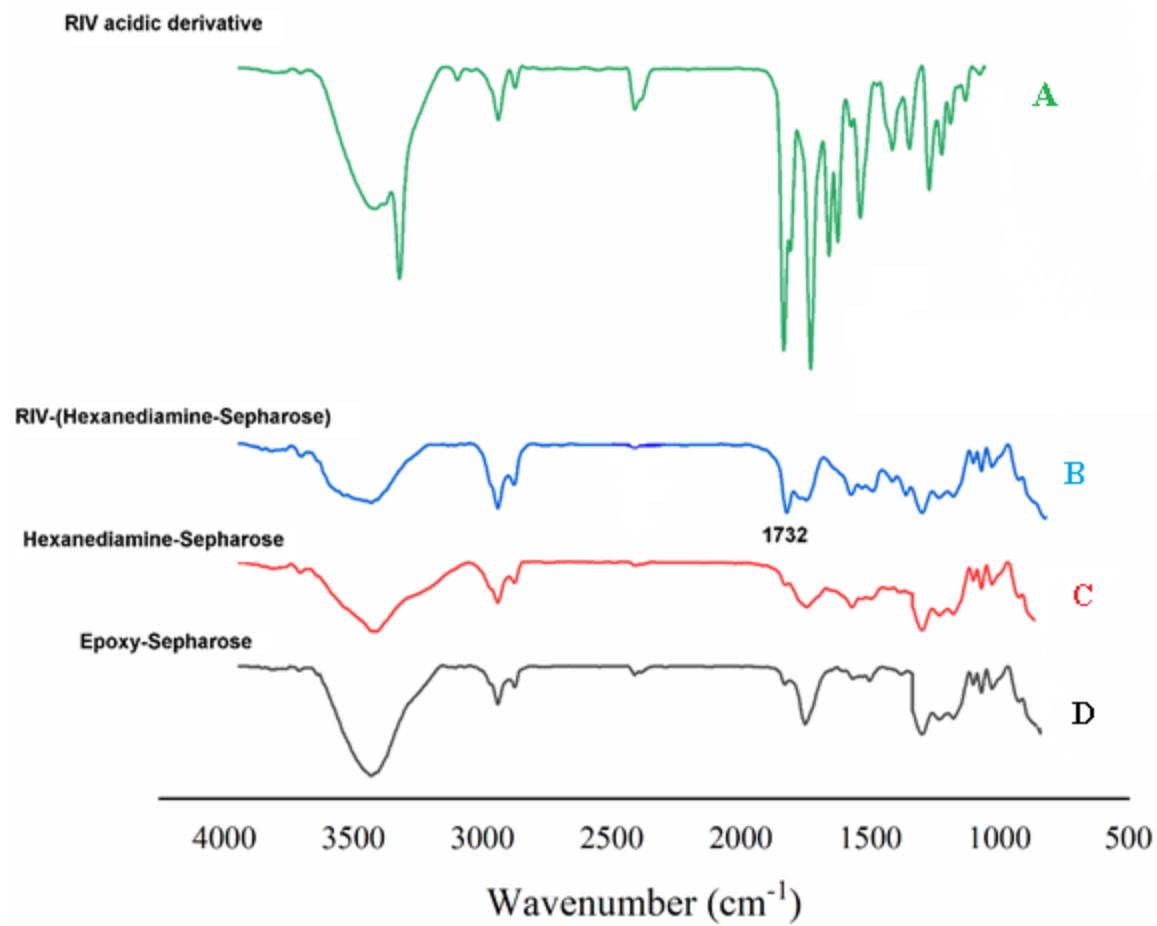

**Figure S5.** FT-IR spectrum of **A**, RIV acidic derivative, **B**, RIV-hexandiamine-Sepharose, **C**, hexandiamine-Sepharose, **D**, epoxy-Sepharose

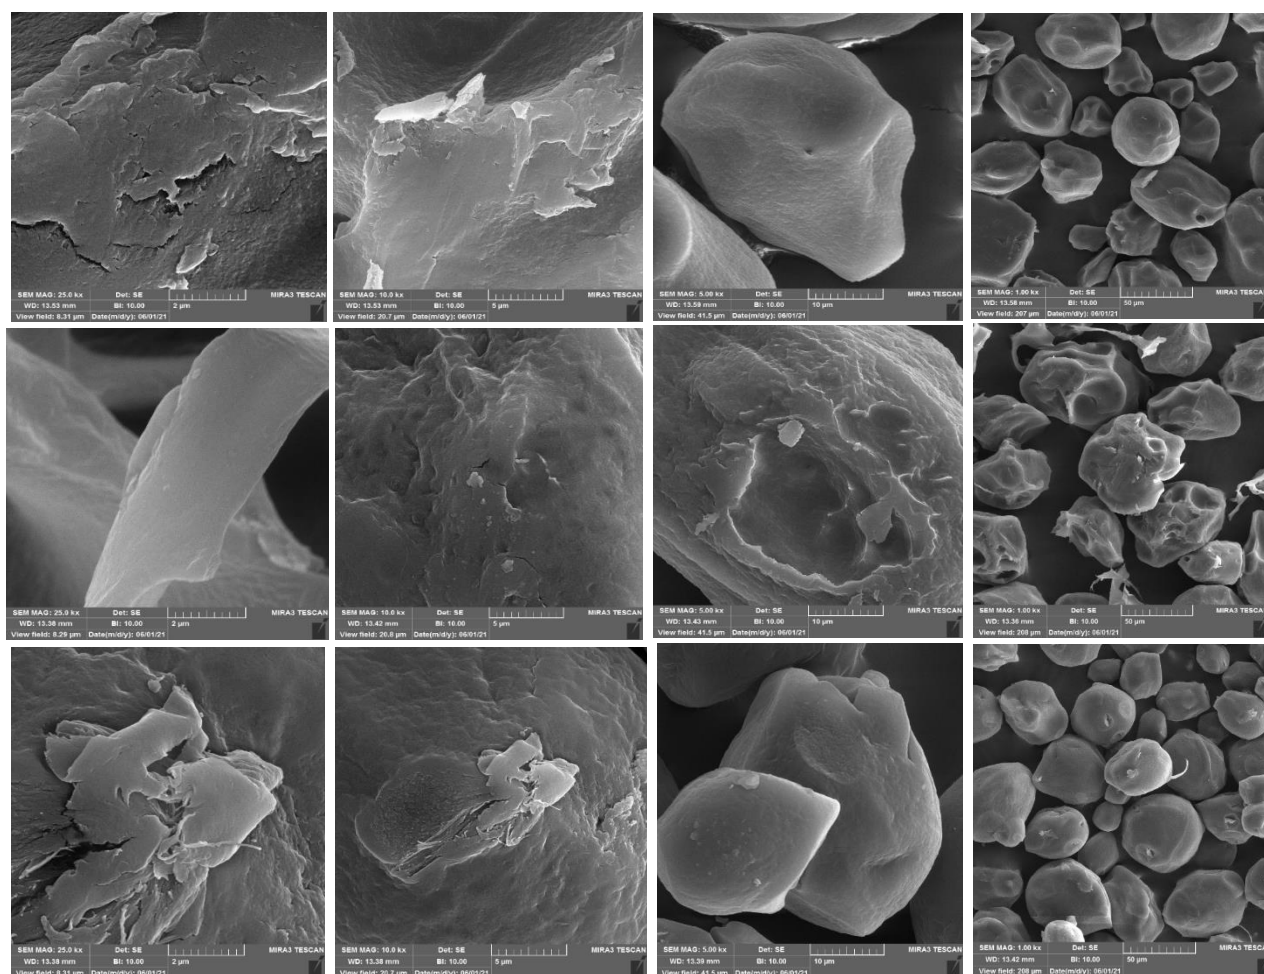

**Figure S6.** FE-SEM images of Sepharose beads at different magnification. For first row: epoxy-activated Sepharose 6B, second row: Sepharose-hexanediamine, and third row: Riv-(Sepharose-hexanediamine) matrix.

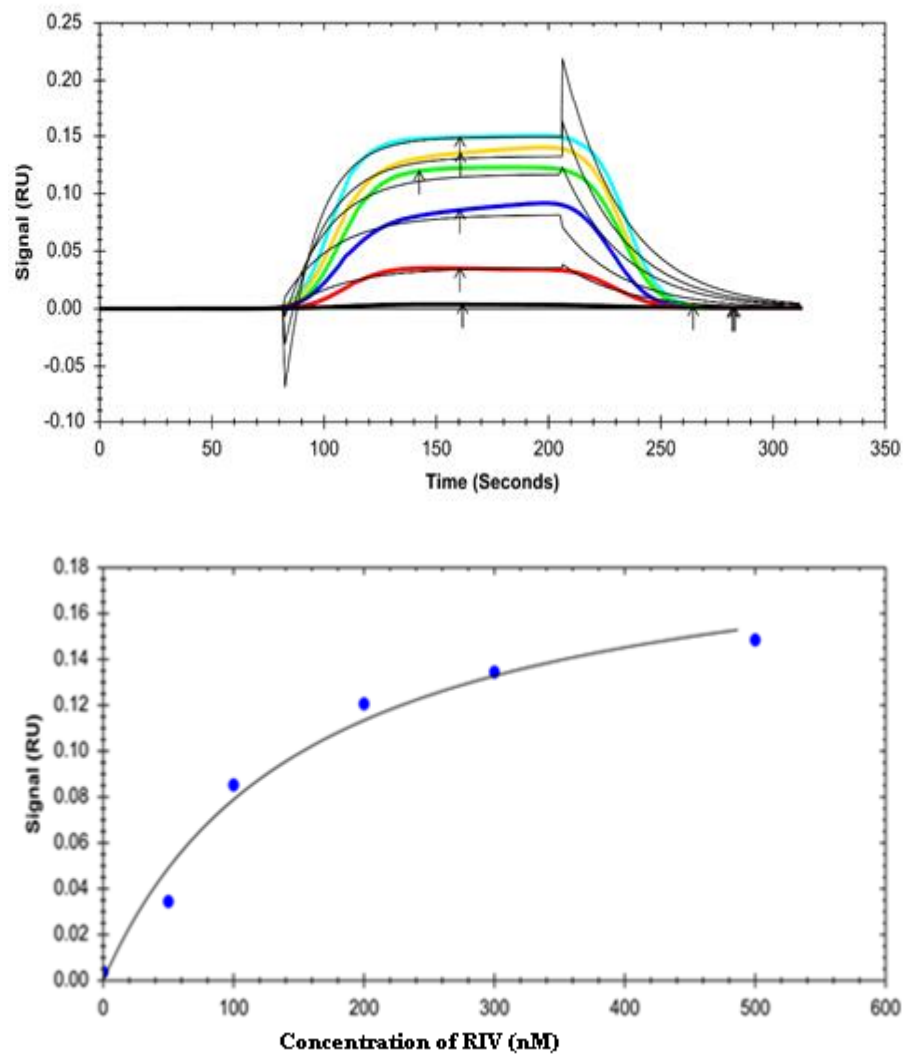

**Figure S7.** SPR sensor response for determination of the dissociation constants ( $k_d$ ) of thiolated aptamer in combination with a concentration series of the target RIV (20–500 nM). On the basis of the obtained curves, non-linear regression analysis was used to compute  $K_d$  values.

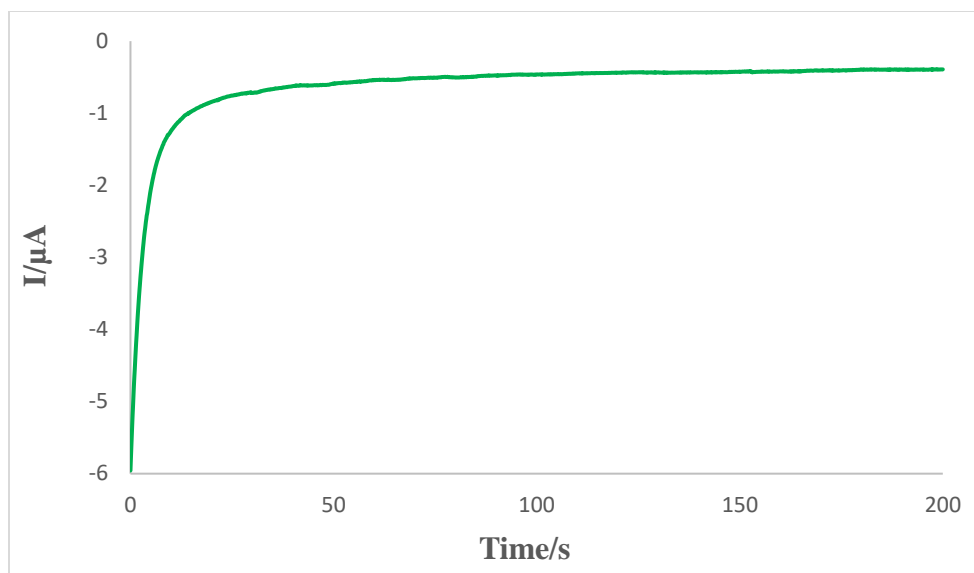

**Figure S8.** ChA of electrodeposition of AuNPs on the surface of ITO-PET-OH at the potential of  $E=0.0$  V, time=200 s. 0.01 M  $\text{HAuCl}_4 \cdot 3\text{H}_2\text{O}$  and 0.01 M CTAB and arginine (0.003 g).

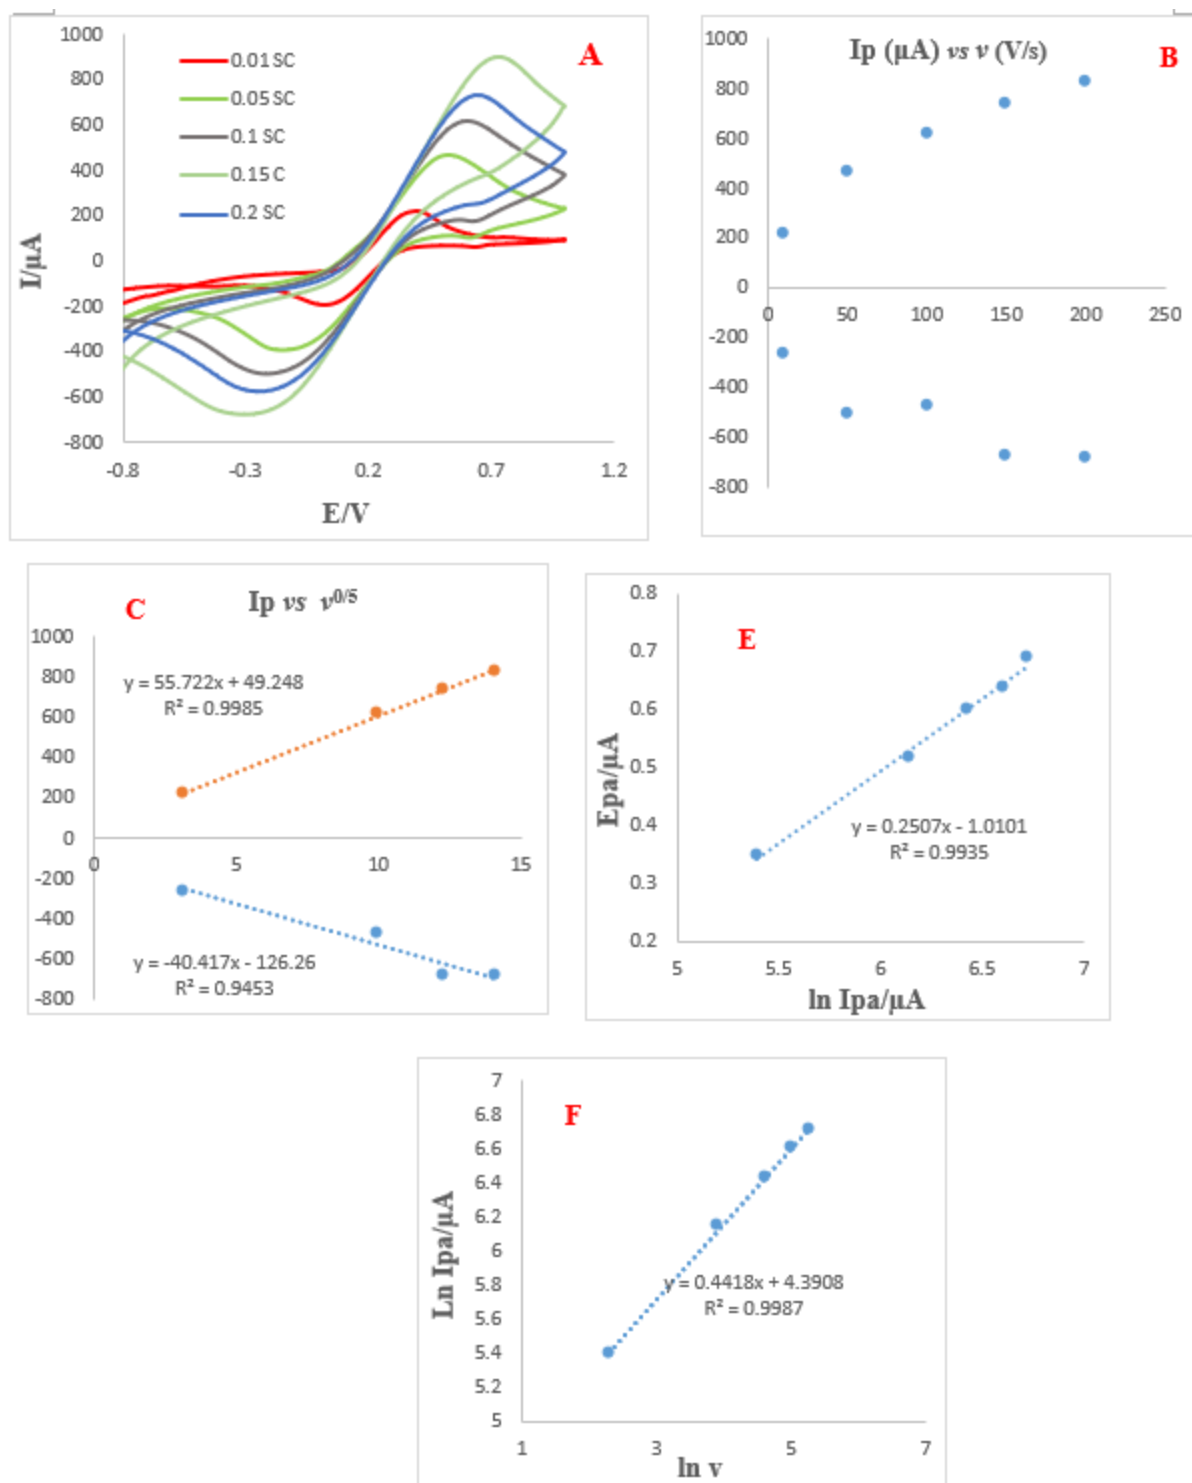

**Figure S9.** **A)** CVs of ITO-PET/OH/AuNPs in 0.01M  $\text{Fe}(\text{CN})_6^{3-/4-}$  containing KCl, in various potential sweep rates (from inner to outer): 10, 50, 100, 150, 200, and 1000  $\text{mVs}^{-1}$ , respectively. **B)** Dependence of anodic/cathodic peak currents vs. sweep rate. **C)** Dependence of anodic/cathodic peak currents vs. square



root of potential sweep rate. **E)** Tafel plot (variation of peak potential *versus*  $\ln I_{pa}$ . **F)** Dependency of  $\ln I_{pa}$  *versus*  $\ln v$ .

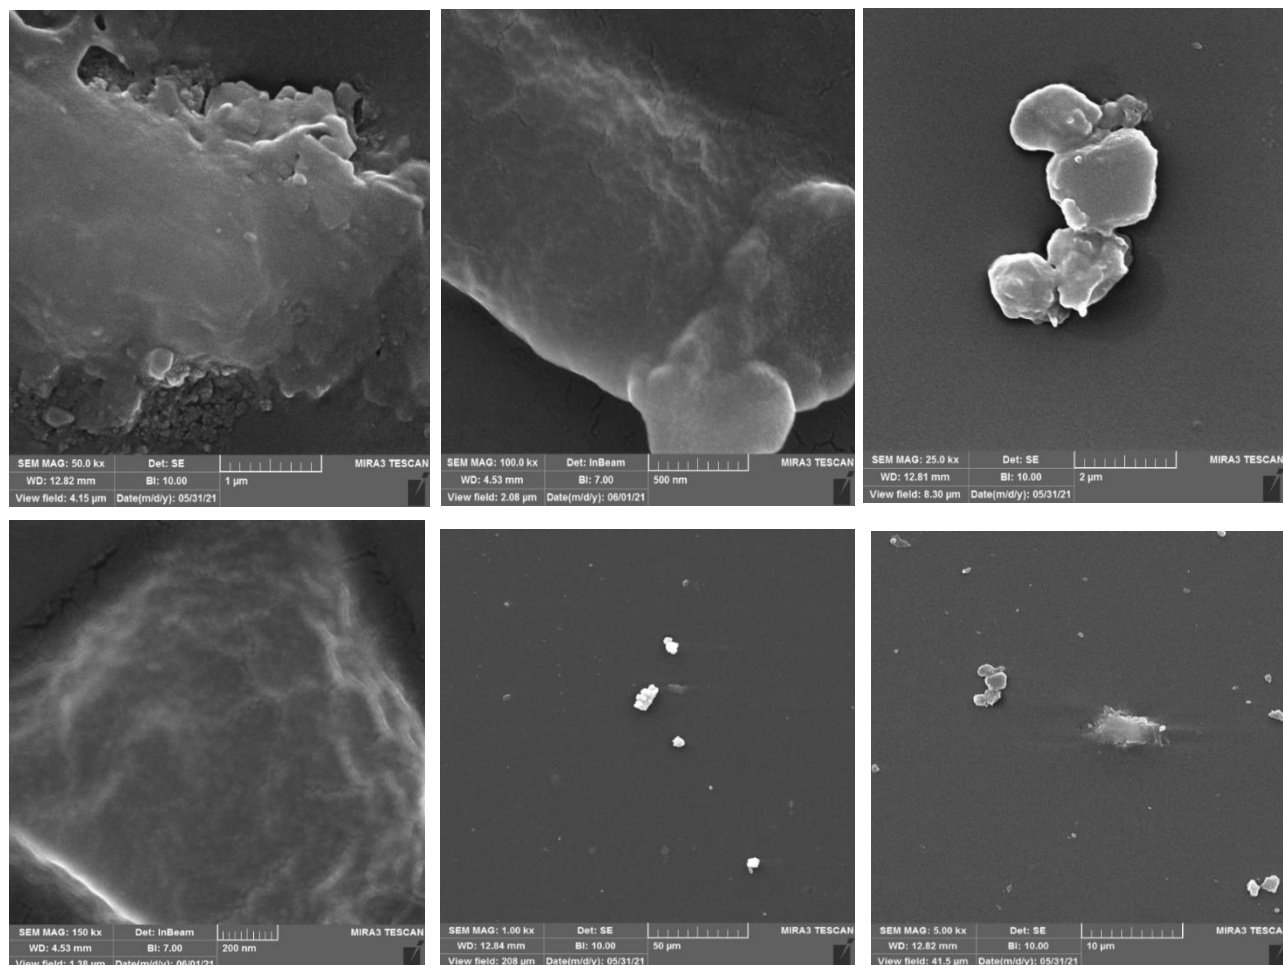

**Figure S10A.** FESEM images ITO PET-OH electrode in different magnifications.

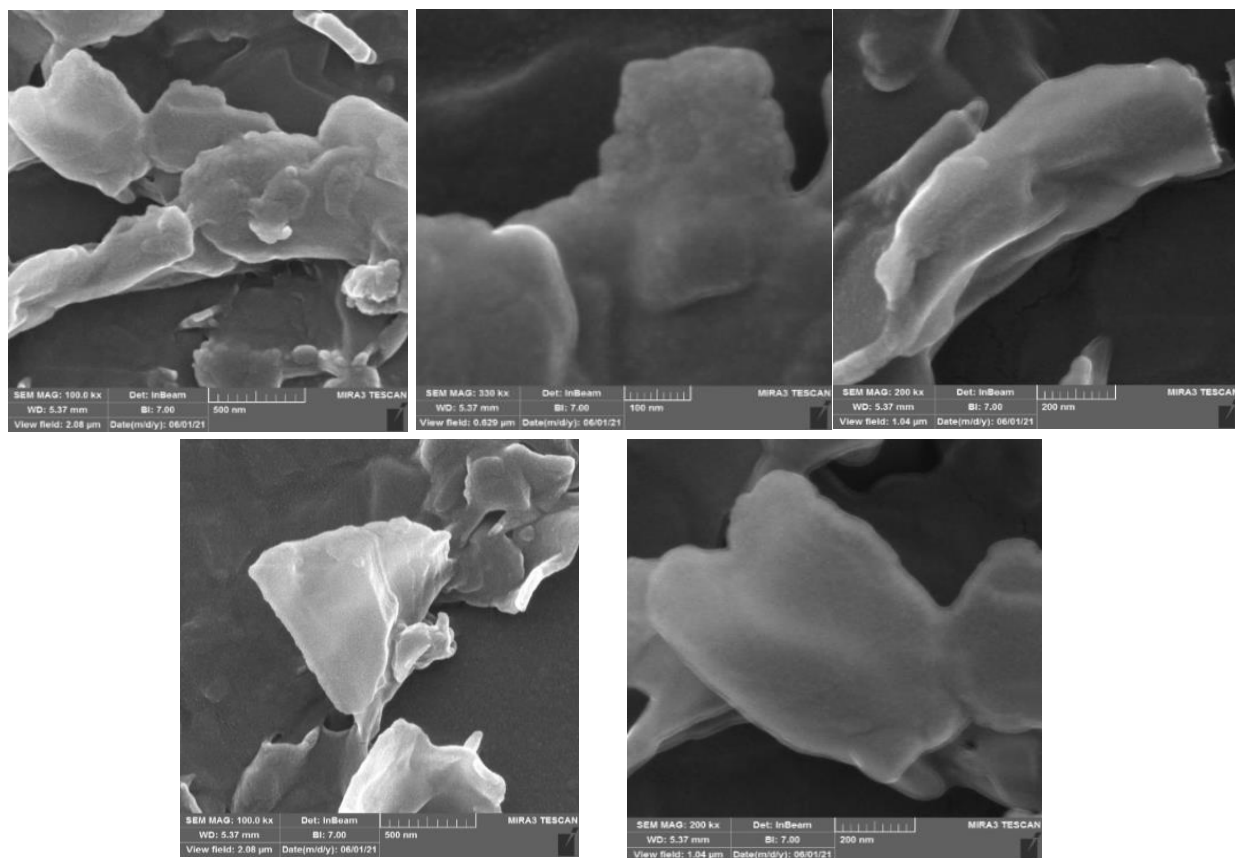

**Figure S10B.** FE-SEM images of ITO PET-OH modified Au electrode at various magnifications.

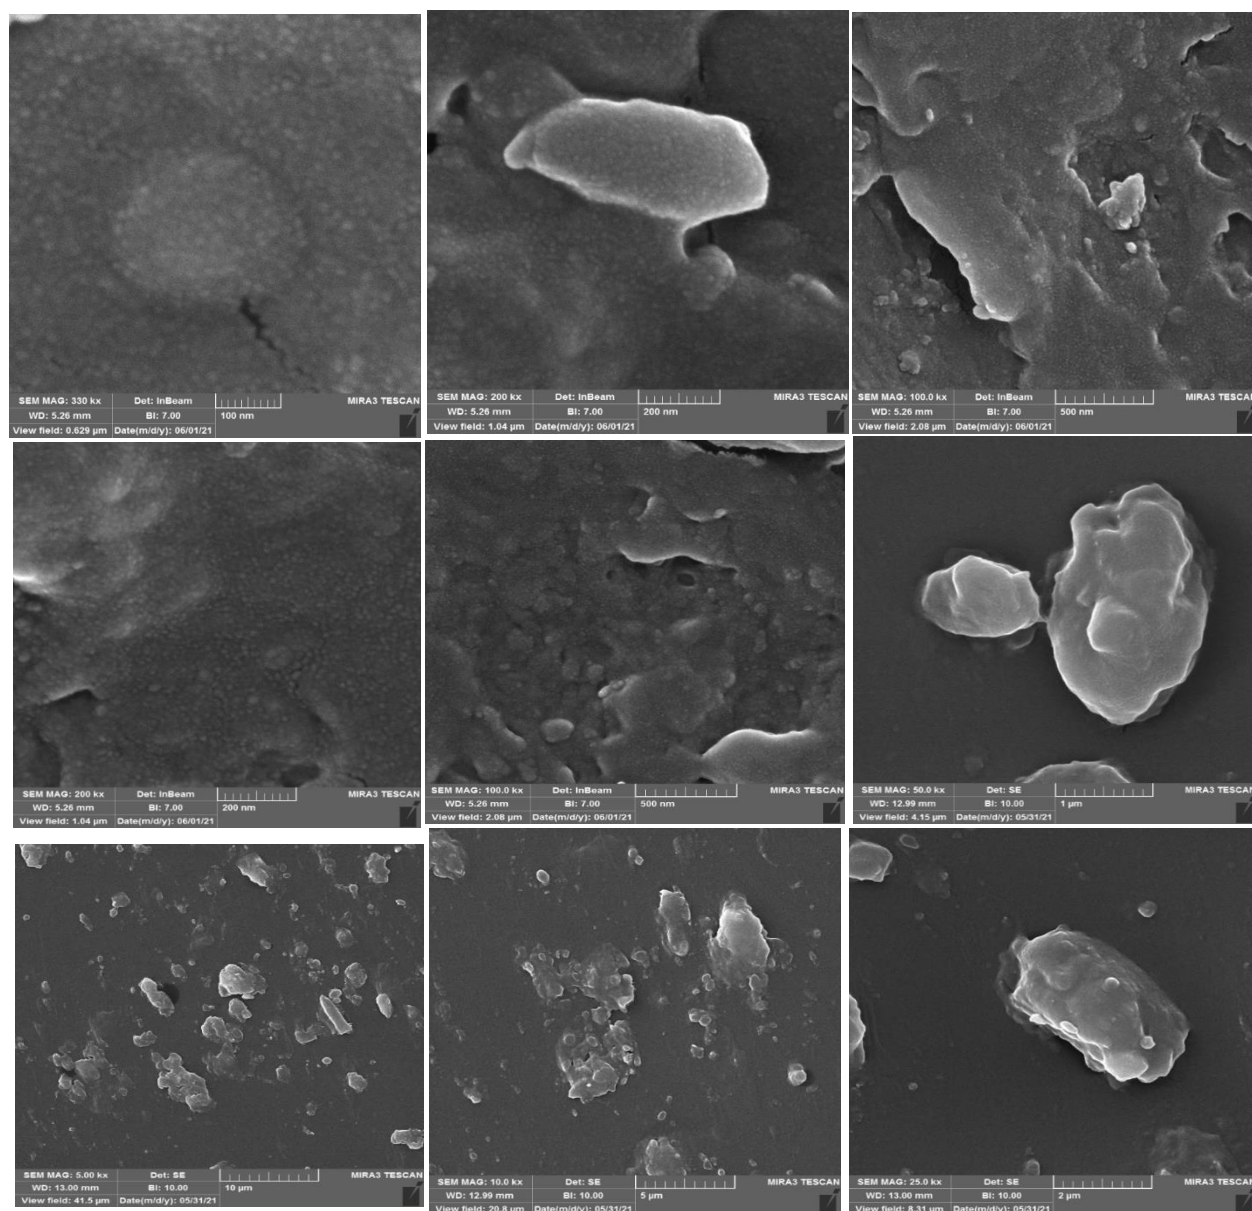

**Figure S10C.** FE-SEM of ITO PET-OH-AuNPs-aptamer in different magnifications.

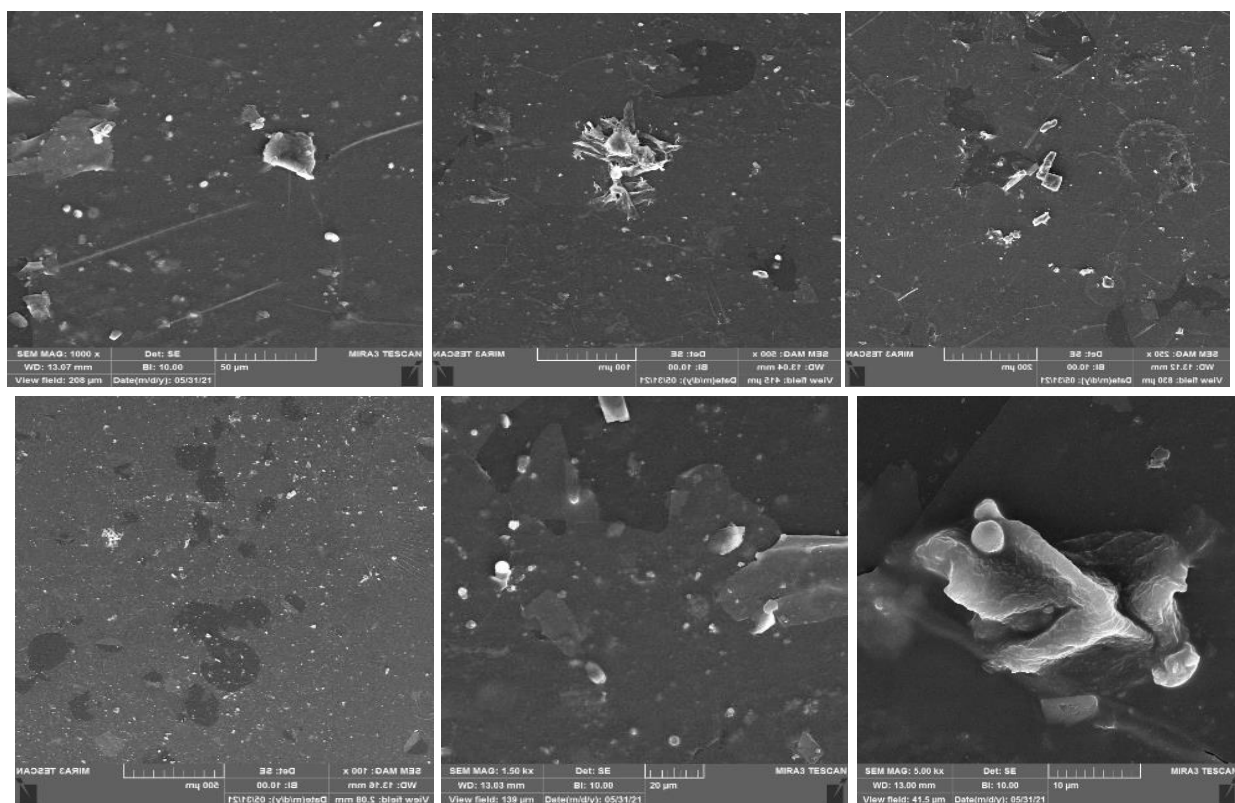

**Figure S10D.** FE-SEM image of ITO PET- OH-AuNPs-aptamer after incubation with RIV in different magnification.

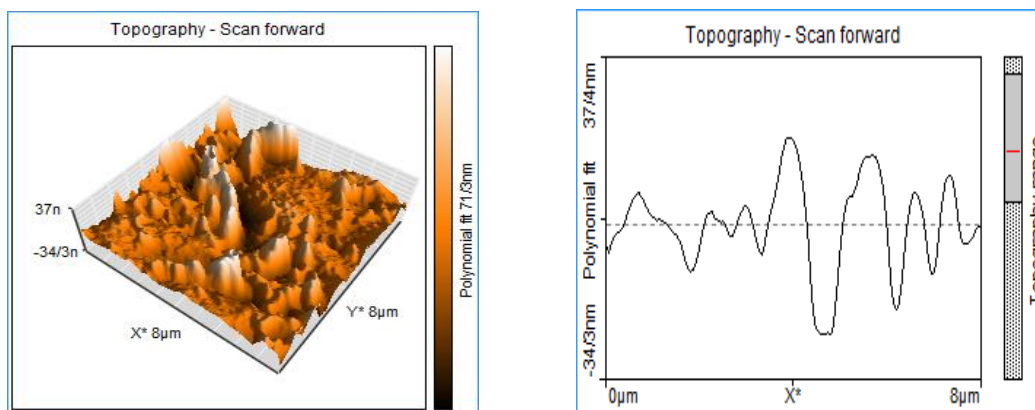

(A). ITO-PET-OH

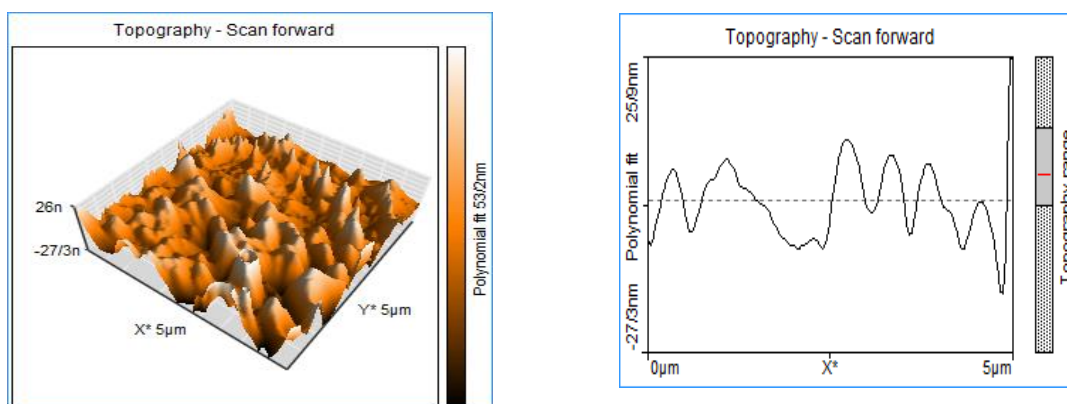

(B). ITO-PET-OH-AuNPs

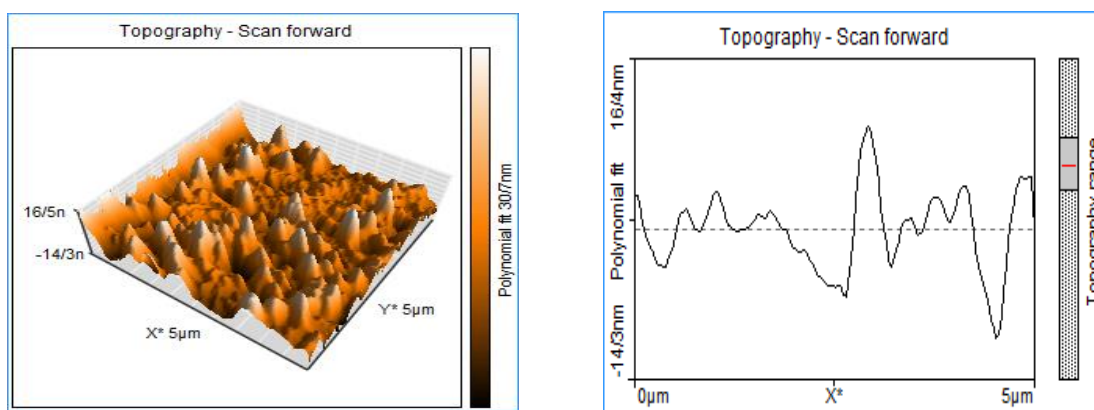

(C). ITO-PET-OH-AuNPs-aptamer

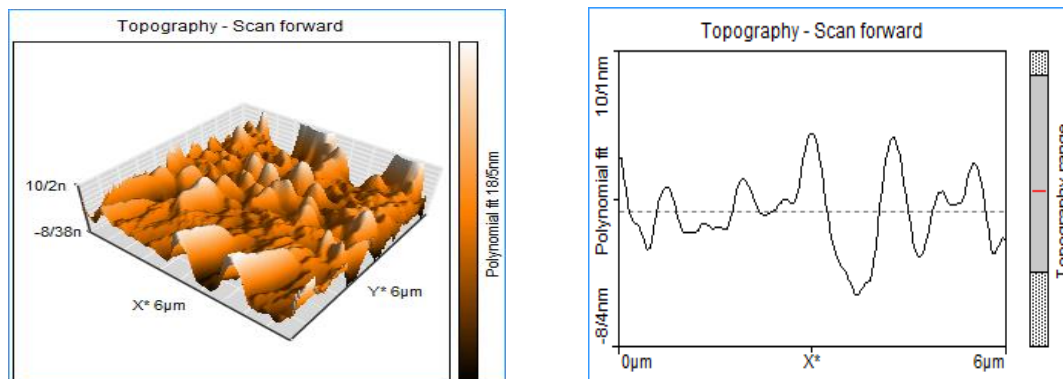

(D). ITO-PET-OH-AuNPs-aptamer/RIV

**Figure S11.** Topographical AFM images of (A) ITO film on PET, (B) ITO-PET/OH, (C) ITO-PET/OH/AuNPs, (D) electrode substrates after thiol aptamer assembly and planar ITO-PET/OH/AuNPs/aptamer/RIV substrates

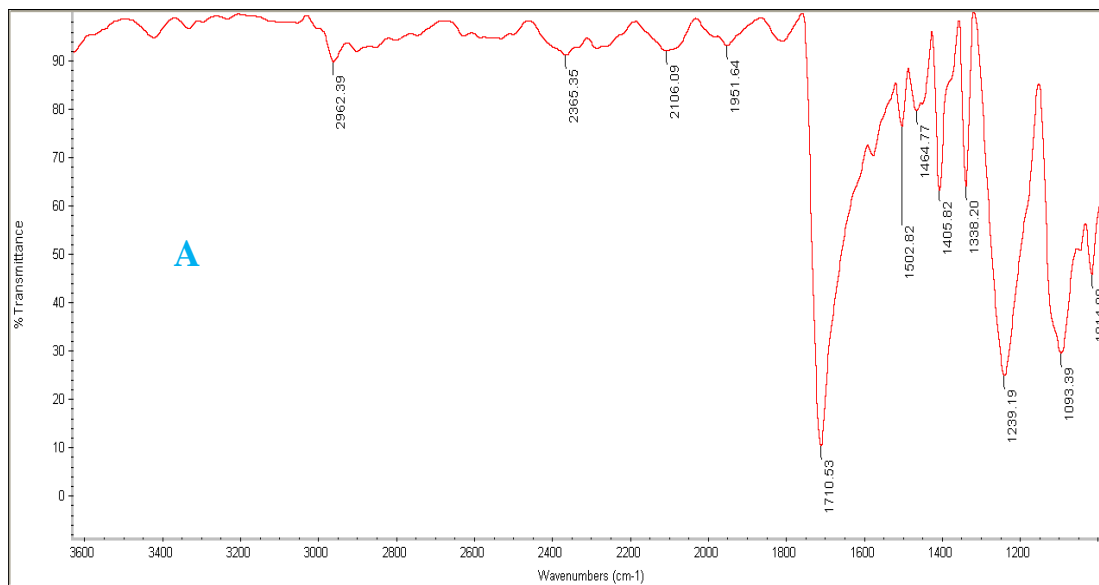

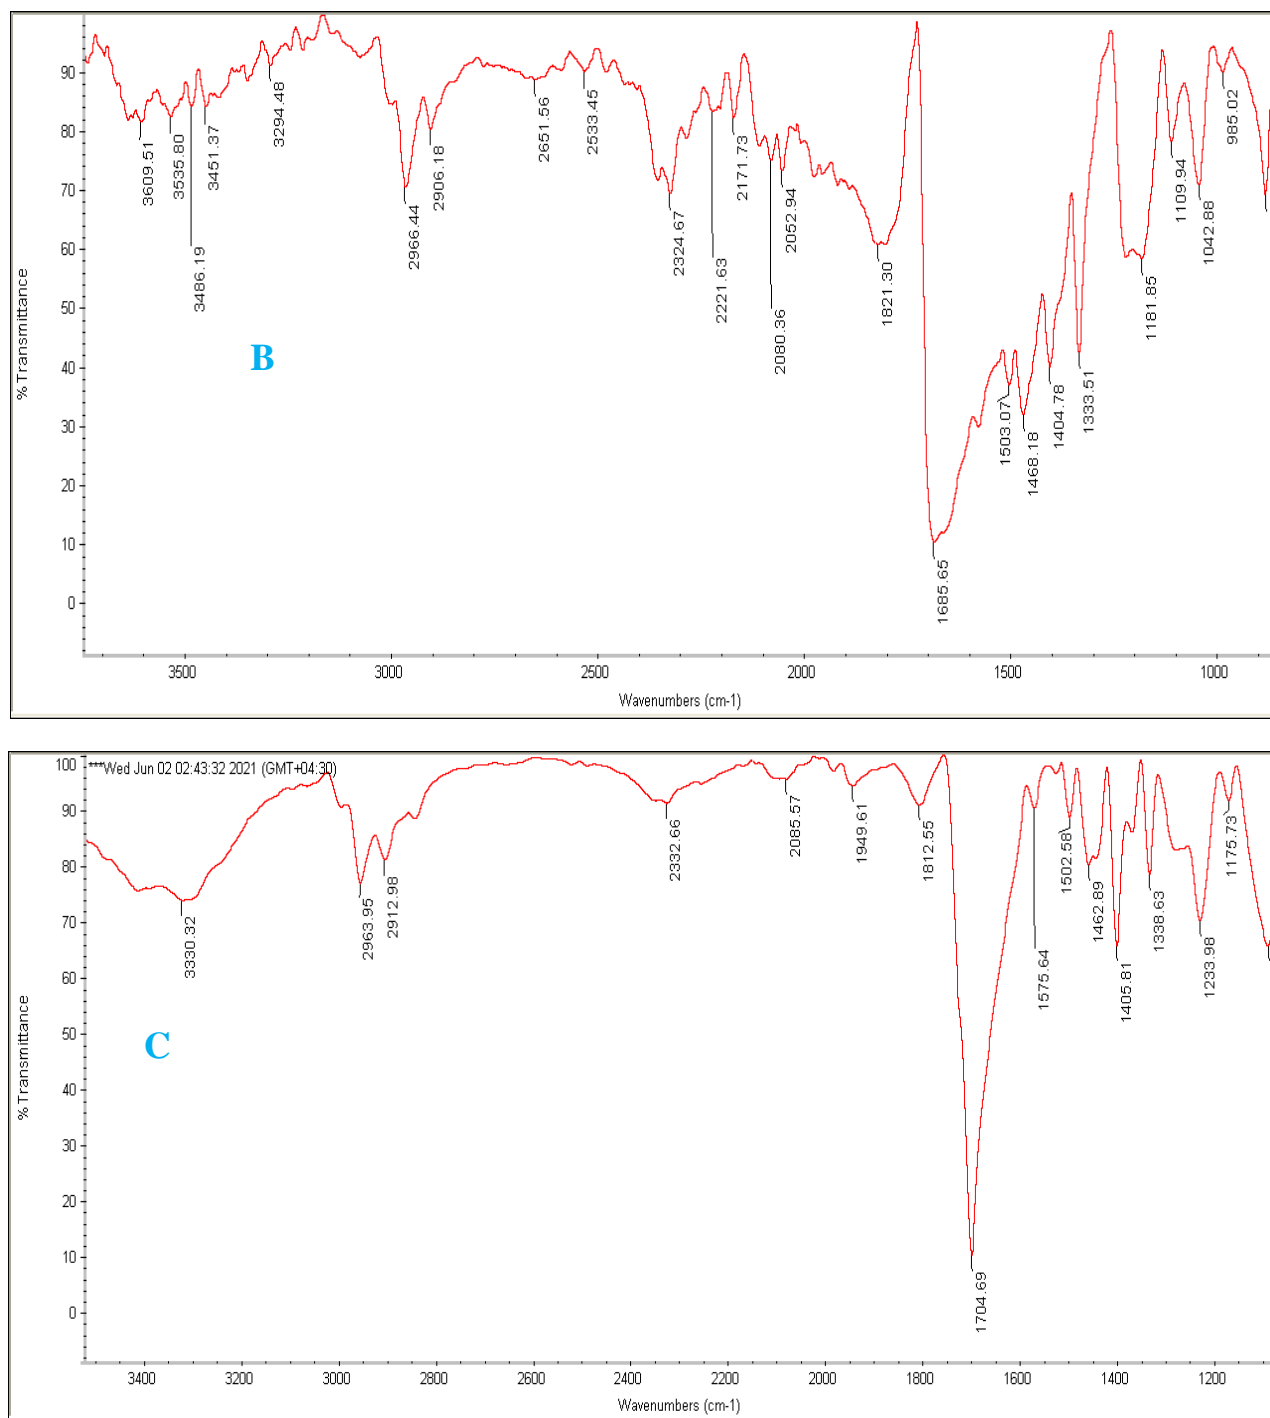

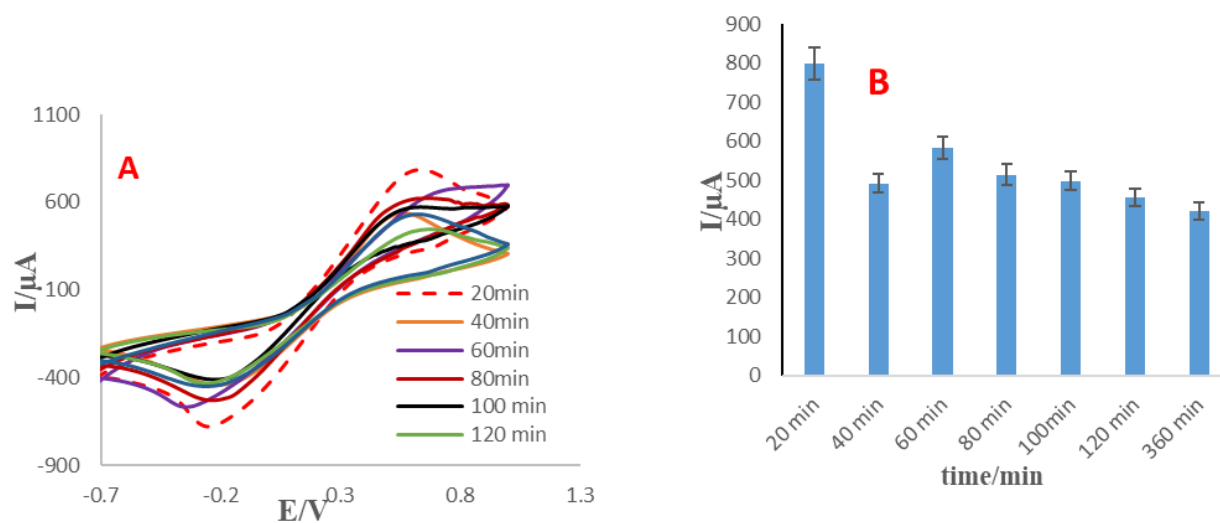

**Figure S13.** Optimization of various incubation time (20, 40, 60, 80, 100, 120 and 360 min) for aptamer immobilization (A) CVs of ITO PET-OH-Au NPs-aptamer in ferrocyanide/ferricyanide/KCl (0.01 M) at the potential range of -1 to +1 V, sweep rate: 100 mv/s (B) Histogram of peak current *versus* time of incubation. (n=3)



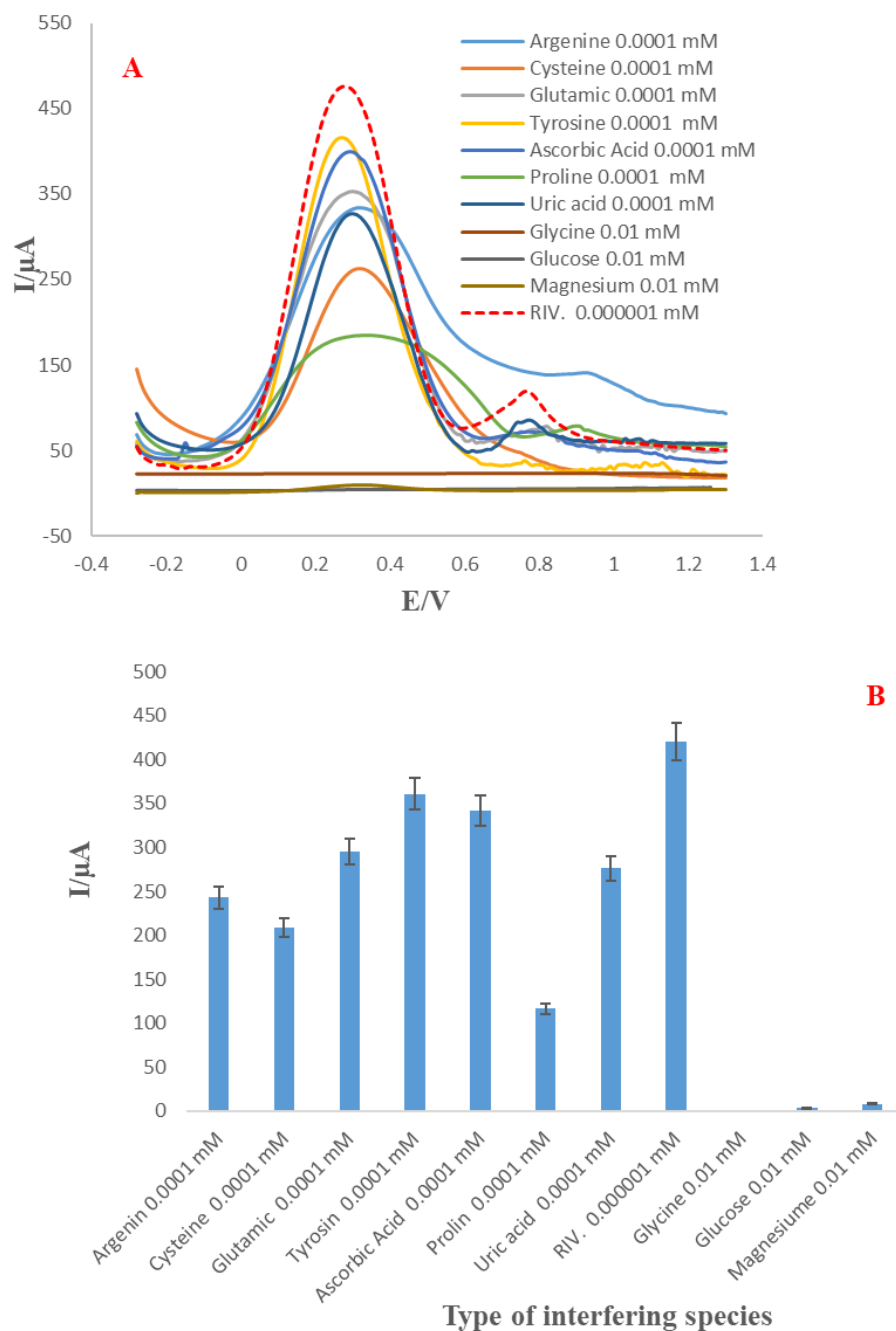

**Figure S14.** **A)** SWV of aptasensor in the presence of different interfering agents. **B)** Variation of peak currents *versus* type of interfering species. Supporting electrolyte is 0.01 M  $[\text{Fe}(\text{CN})_6]^{3-/4-}$ , SWV parameters: potential range of -1 V to +1 V with a step potential of 0.01 mV, amplitude 0.25 mV and frequency 1 Hz.

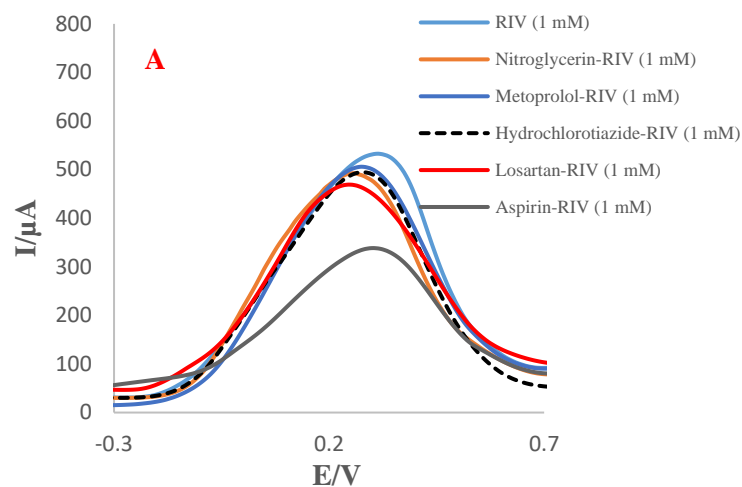

**B**

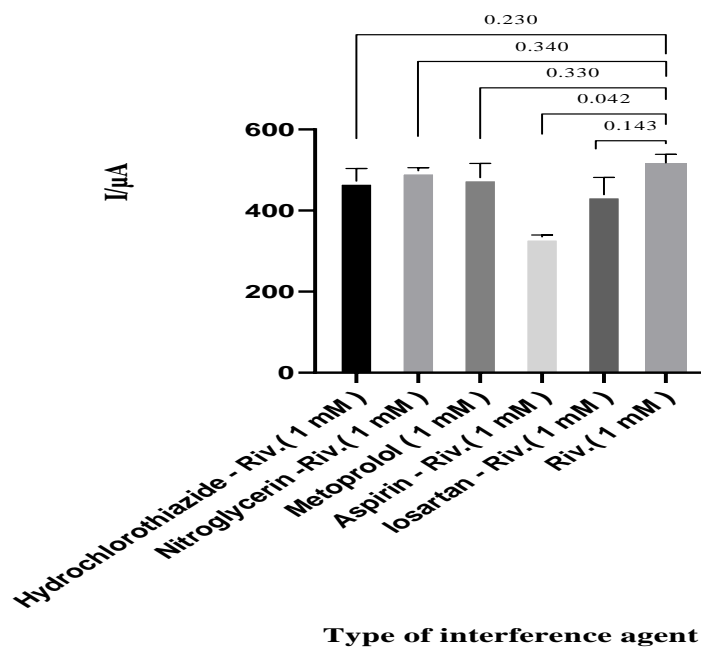

**Figure S15.** A) SWV of aptasensor in the presence of different species (hydrochlorothiazide, metoprolol, nitroglycerin, atorvastatin, aspirin, and losartan). B) Dependency of peak currents of aptasensor *versus* the type of interfering agents. The concentrations of analogs were 1 mM. Supporting electrolyte is 0.01 M  $[\text{Fe}(\text{CN})_6]^{3-/4-}$ , SWV parameters: potential range of -1 V to +1 V with a step potential of 0.01 mV, amplitude 0.25 mV, and frequency 1 Hz. Statistical significance was determined by Paired t-test. The aspirin shows a significantly lower response than other drugs ( $p < 0.05$ ) indicating significant differences relative to displayed bars as determined.

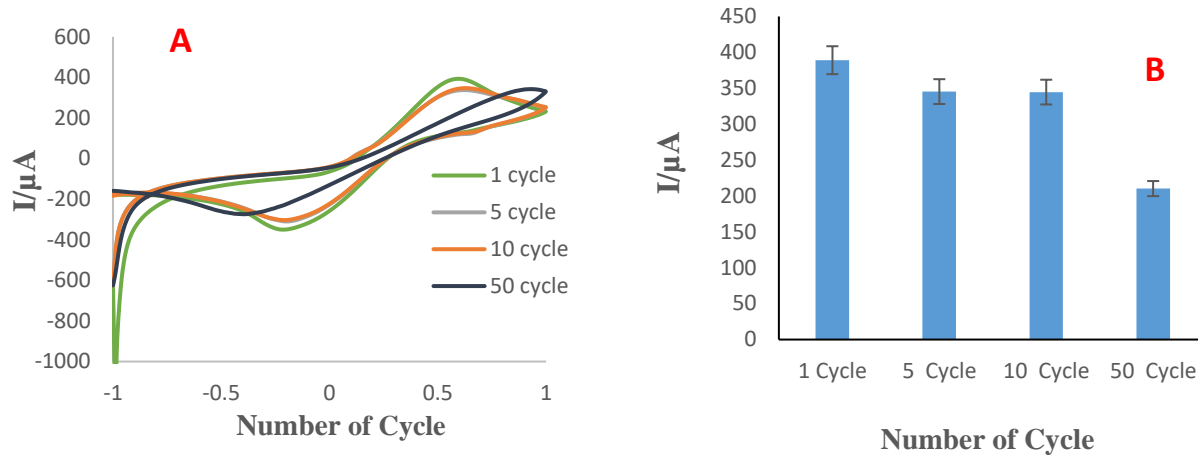

**Figure S16.** A) CVs of ITO-PET-OH-AuNPs in different cycle number (1-50 Cycle). **B)** Histogram of peak current *versus* number of cycles. Sweep rate is 100 mV/s. supporting electrode is  $[\text{Fe}(\text{CN})_6]^{3-/4-}/\text{KCl}$  (0.01 M)]. (n=3).

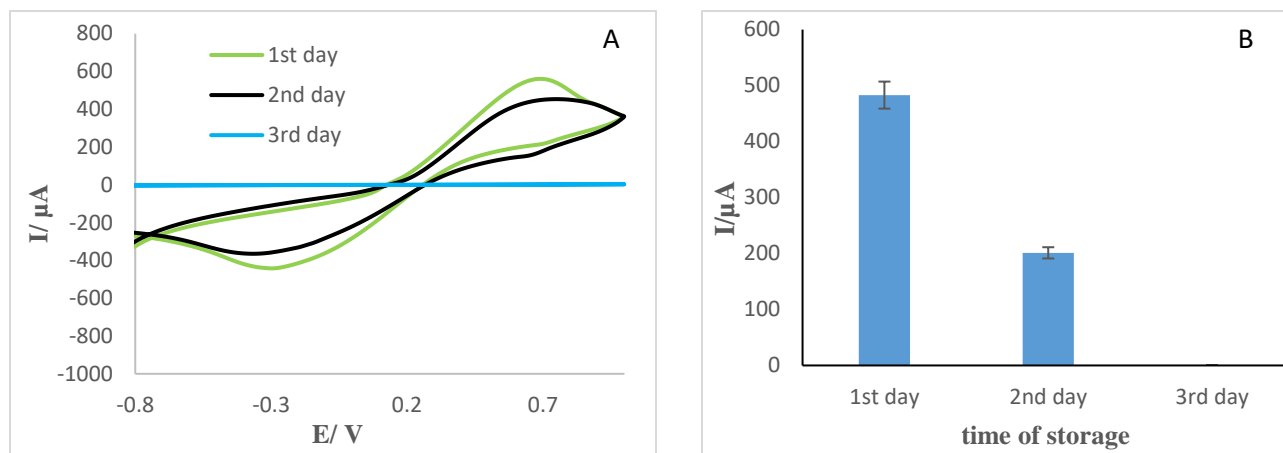

**Figure S17.** A, CVs of ITO-PET-OH-AuNPs/Aptamer in the various storage time (24, 48, and 72 h) in supporting electrolyte  $[\text{Fe}(\text{CN})_6]^{3-/4-}/\text{KCl}$  (0.01 M) sweep rate is 100 mv/s. (1–3 days). (n=3). B) Histogram of peak current *versus* time of Storage.

**Table S1.** Validation data of proposed method for quantification of RIV in exhaled breath condensate (EBC) and human plasma samples (n=3).

| Parameters              | EBC    | Plasma |
|-------------------------|--------|--------|
| Linear range (nM)       | 10-600 | 10-600 |
| Slope                   | 0.1609 | 0.196  |
| Intercept               | 90.163 | 38.356 |
| Correlation coefficient | 0.9952 | 0.9941 |
| Number of data points   | 7      | 8      |
| LOD (nM)                | 6.03   | 14.08  |
| LOQ (nM)                | 19.9   | 46.47  |

**Table S2.** Recovery of RIV from exhaled breath condensate (EBC) and plasma samples (n=3). Data are presented as mean  $\pm$  relative standard deviation (RSD)

| plasma and EBC samples | Added RIV (nM) | EBC                |              |               | Plasma             |              |               |
|------------------------|----------------|--------------------|--------------|---------------|--------------------|--------------|---------------|
|                        |                | Found (nM)         | Recovery (%) | RSD (%) (n=3) | Found (nM)         | Recovery (%) | RSD (%) (n=3) |
| 1                      | 10             | 7.6 ( $\pm$ 3.7)   | 88.7         | 6.1           | 22 ( $\pm$ 2.1)    | 107.7        | 4.9           |
| 2                      | 50             | 57.9 ( $\pm$ 2.2)  | 101.8        | 2.3           | 46.5 ( $\pm$ 2.5)  | 108.1        | 5.0           |
| 3                      | 100            | 118.5 ( $\pm$ 0.5) | 104.3        | 0.4           | 95.6 ( $\pm$ 1.3)  | 99.5         | 2.3           |
| 4                      | 300            | 289 ( $\pm$ 1.9)   | 98.9         | 1.4           | 280.3 ( $\pm$ 1.3) | 96.2         | 2.0           |
| 5                      | 500            | 494.7 ( $\pm$ 2.2) | 99.5         | 1.3           | 498.7 ( $\pm$ 2.2) | 99.7         | 1.6           |

**Table S3.** Comparison of the recovery of RIV from exhaled breath condensate (EBC) and plasma samples (n=3), and the relative standard deviations (RSD %) analyzed by the proposed aptasensor and LC-MS/MS method

| Sample (nM) | EBC Recoveries (%) |                     | Plasma Recoveries (%) |                    |
|-------------|--------------------|---------------------|-----------------------|--------------------|
|             | Aptasensor         | LC-MS/MS            | Aptasensor            | LC-MS/MS           |
| 10          | 88.7 ( $\pm$ 6.1)  | 107.0 ( $\pm$ 0.21) | 107.7 ( $\pm$ 4.9)    | 103.3 ( $\pm$ 2.1) |
| 50          | 101.8 ( $\pm$ 2.3) | 105.7 ( $\pm$ 0.2)  | 108.1 ( $\pm$ 5.0)    | 105.4 ( $\pm$ 0.8) |
| 100         | 104.3 ( $\pm$ 0.4) | 100.2 ( $\pm$ 0.25) | 99.5 ( $\pm$ 2.3)     | 98.9 ( $\pm$ 0.4)  |
| 300         | 98.9 ( $\pm$ 1.4)  | 96.7 ( $\pm$ 0.06)  | 96.2 ( $\pm$ 2.0)     | 99.9 ( $\pm$ 0.2)  |
| 500         | 99.5 ( $\pm$ 1.3)  | 101.0 ( $\pm$ 0.08) | 99.7 ( $\pm$ 1.6)     | 99.7 ( $\pm$ 0.1)  |

**Table S4.** The repeatability of aptasensor

| Concentration(nM) | Ip1 | Ip2 | SD   | AVE <sub>STDV</sub> |
|-------------------|-----|-----|------|---------------------|
| 10                | 278 | 276 | 1.41 | 2.8                 |
| 50                | 300 | 295 | 3.53 |                     |
| 100               | 321 | 317 | 2.82 |                     |
| 300               | 411 | 414 | 2.12 |                     |
| 500               | 474 | 480 | 4.24 |                     |
